# Supplementary material for: Sulfonic Resins as Catalysts for the Oxidation of Alcohols with H2O2/KBr
Source: MDPI journal article supplement (doi:10.3390/catal14010074), 2024-01-17
Supplement: s1 [file s1]

## Electronic Supplementary Information

### Sulfonic resins as catalysts for the oxidation of alcohols with H<sub>2</sub>O<sub>2</sub>/KBr

Vicente Dorado, Clara I. Herrerías and José M. Fraile\*

*Instituto de Síntesis Química y Catálisis Homogénea (ISQCH), CSIC-Universidad de Zaragoza, Facultad de Ciencias, C/ Pedro Cerbuna 12, 50009 Zaragoza, Spain*

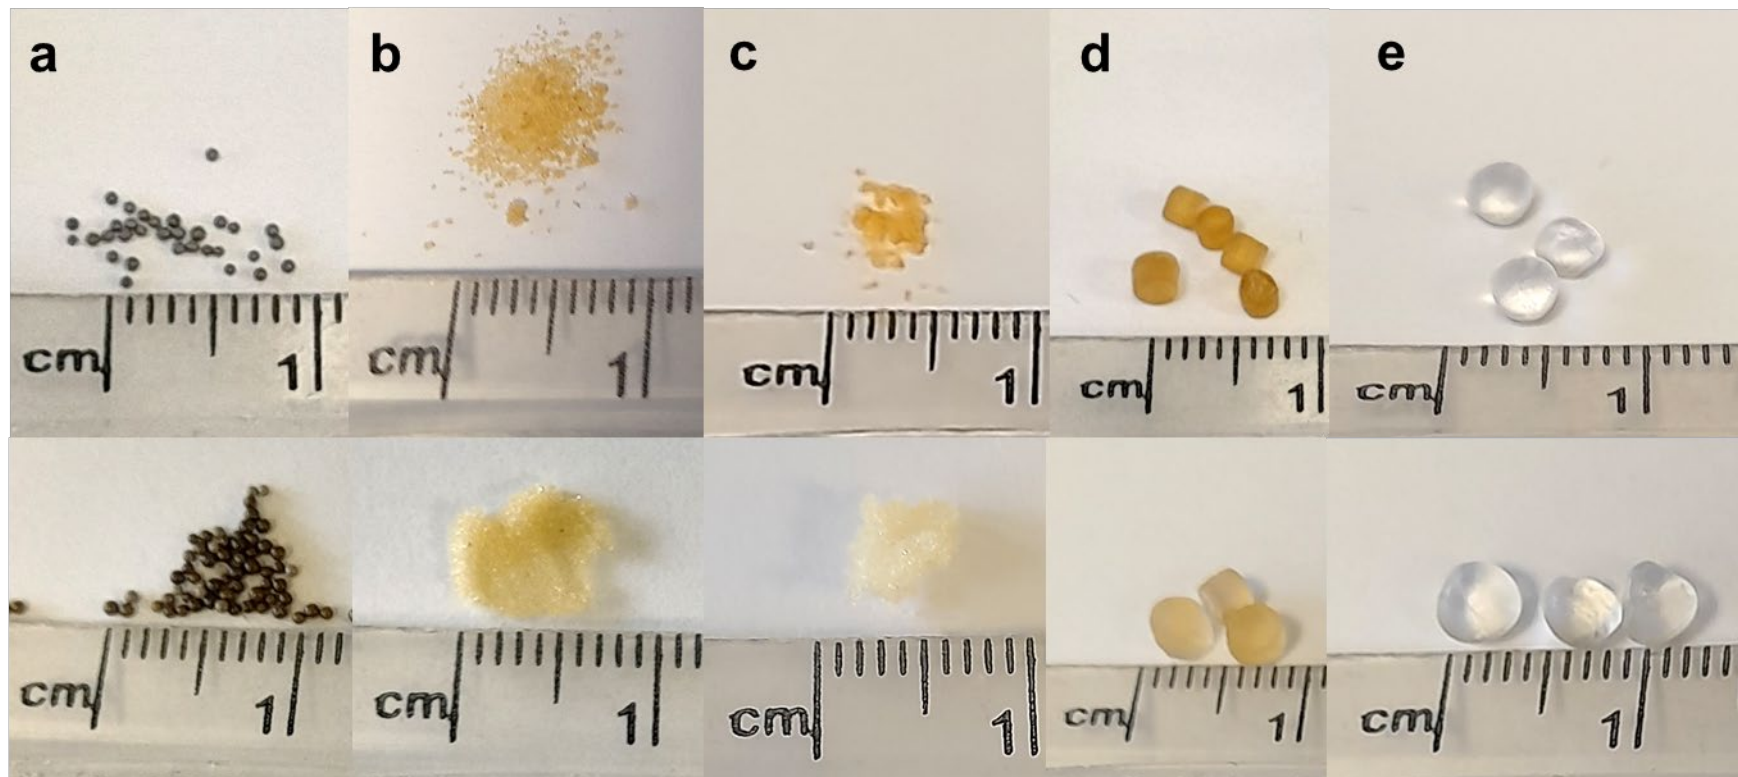

**Figure S1.** Swelling behavior of the different resins used in this work: a) Amberlyst 15; b) Dowex 50W×8; c) Dowex 50W×2; d) Aquivion P98 (acid form); e) Nafion NR50. Top: dry resins. Bottom: swollen resins in  $\text{CH}_2\text{Cl}_2/\text{H}_2\text{O}$  (9:1 v/v).
